# Supplementary material for: Dirhodium (ii) carboxylate complexes as building blocks. cis-Chelating dicarboxylic acids designed to bridge the dinuclear coreElectronic supplementary information (ESI) available: Tables S1 and S2. See http://www.rsc.org/suppdata/nj/b3/b310008a/
Source: Royal Society of Chemistry journal article supplement (doi:10.1039/b310008a), 2004-01-01
Supplement: b310008a.pdf [file b310008a.pdf]

**Supplementary information.**

**Table S1.** Molecular mechanics data for ligand dimethyl esters (figure 2)

| Ligand<br>(diester) | Intercarbonyl<br>distance/Å | $\Delta E$<br>/kJmol <sup>-1</sup> | Symmetry<br>number s | Population |
|---------------------|-----------------------------|------------------------------------|----------------------|------------|
| 5                   | 8.80                        | 0.00                               | 2                    | 0.52       |
|                     | 6.80                        | 5.30                               | 4                    | 0.12       |
|                     | 8.00                        | 5.30                               | 1                    | 0.03       |
|                     | 9.40                        | 5.40                               | 1                    | 0.03       |
|                     | 7.30                        | 6.60                               | 4                    | 0.07       |
|                     | 8.70                        | 7.00                               | 4                    | 0.06       |
|                     | 4.60                        | 7.10                               | 4                    | 0.06       |
|                     | 8.80                        | 8.30                               | 4                    | 0.04       |
|                     | 8.80                        | 8.40                               | 4                    | 0.04       |
|                     | 8.60                        | 8.90                               | 4                    | 0.03       |
| 6                   | 8.25                        | 0.00                               | 2                    | 0.20       |
|                     | 6.50                        | 0.62                               | 4                    | 0.31       |
|                     | 4.60                        | 0.67                               | 2                    | 0.15       |
|                     | 8.25                        | 4.18                               | 4                    | 0.08       |
|                     | 5.92                        | 5.14                               | 4                    | 0.05       |
|                     | 6.66                        | 6.15                               | 4                    | 0.03       |
|                     | 4.42                        | 6.46                               | 4                    | 0.03       |
|                     | 7.96                        | 7.24                               | 4                    | 0.02       |
|                     | 4.11                        | 7.58                               | 4                    | 0.02       |
|                     | 7.93                        | 7.63                               | 4                    | 0.02       |
|                     | 6.27                        | 8.03                               | 4                    | 0.02       |
|                     | 8.03                        | 8.03                               | 4                    | 0.02       |
|                     | 6.29                        | 8.16                               | 4                    | 0.02       |
|                     | 7.08                        | 9.03                               | 4                    | 0.01       |
|                     | 6.41                        | 9.20                               | 4                    | 0.01       |
|                     | 5.58                        | 9.47                               | 4                    | 0.01       |
| 4.26                | 10.68                       | 4                                  | 0.01                 |            |
| 7                   | 4.53                        | 0.00                               | 4                    | 0.59       |
|                     | 6.68                        | 2.05                               | 4                    | 0.26       |
|                     | 5.77                        | 6.25                               | 4                    | 0.05       |
|                     | 6.40                        | 7.92                               | 4                    | 0.02       |
|                     | 8.59                        | 8.33                               | 2                    | 0.01       |
|                     | 8.21                        | 8.63                               | 4                    | 0.02       |
|                     | 6.66                        | 8.67                               | 4                    | 0.02       |
|                     | 6.65                        | 8.81                               | 4                    | 0.02       |
|                     | 4.56                        | 10.66                              | 4                    | 0.01       |
|                     | 8                           | 4.30                               | 0.00                 | 4          |
| 4.50                |                             | 1.70                               | 4                    | 0.15       |
| 4.40                |                             | 1.90                               | 4                    | 0.13       |
| 4.50                |                             | 3.40                               | 2                    | 0.04       |

---

|           |      |       |   |      |
|-----------|------|-------|---|------|
|           | 5.00 | 4.10  | 4 | 0.06 |
|           | 4.90 | 4.60  | 4 | 0.05 |
|           | 4.40 | 4.80  | 4 | 0.04 |
|           | 5.00 | 5.90  | 4 | 0.03 |
|           | 5.00 | 5.90  | 2 | 0.01 |
|           | 7.30 | 6.00  | 4 | 0.03 |
|           | 5.20 | 6.30  | 4 | 0.02 |
|           | 5.90 | 6.60  | 4 | 0.02 |
|           | 8.30 | 6.80  | 2 | 0.01 |
|           | 7.40 | 8.00  | 4 | 0.01 |
|           | 7.00 | 8.00  | 4 | 0.01 |
|           | 7.10 | 8.10  | 4 | 0.01 |
|           | 6.60 | 8.20  | 4 | 0.01 |
|           | 5.20 | 8.30  | 4 | 0.01 |
|           | 4.80 | 8.30  | 4 | 0.01 |
|           | 5.40 | 8.40  | 4 | 0.01 |
|           | 7.40 | 8.60  | 4 | 0.01 |
|           | 6.90 | 8.70  | 4 | 0.01 |
|           | 7.40 | 9.00  | 4 | 0.01 |
|           | 6.20 | 9.20  | 4 | 0.01 |
|           | 8.20 | 9.30  | 4 | 0.01 |
|           | 8.50 | 9.50  | 4 | 0.01 |
|           | 7.50 | 9.60  | 4 | 0.01 |
|           | 6.40 | 9.70  | 4 | 0.01 |
| <b>9</b>  | 4.30 | 0.00  | 4 | 0.31 |
|           | 4.20 | 0.10  | 4 | 0.30 |
|           | 4.30 | 1.60  | 2 | 0.08 |
|           | 4.30 | 2.20  | 2 | 0.06 |
|           | 4.60 | 3.70  | 4 | 0.07 |
|           | 5.00 | 4.20  | 2 | 0.03 |
|           | 4.20 | 4.30  | 2 | 0.03 |
|           | 4.25 | 5.70  | 4 | 0.03 |
|           | 4.30 | 6.88  | 4 | 0.02 |
|           | 4.32 | 7.21  | 4 | 0.02 |
|           | 4.50 | 7.30  | 4 | 0.02 |
|           | 4.17 | 7.55  | 4 | 0.02 |
|           | 4.67 | 8.05  | 4 | 0.01 |
|           | 4.31 | 8.68  | 4 | 0.01 |
|           | 4.20 | 10.70 | 4 | 0.00 |
| <b>10</b> | 4.50 | 0.00  | 4 | 0.26 |
|           | 4.20 | 0.90  | 4 | 0.18 |
|           | 4.50 | 1.70  | 4 | 0.13 |
|           | 4.30 | 1.90  | 4 | 0.12 |
|           | 4.20 | 3.30  | 4 | 0.07 |
|           | 4.40 | 4.20  | 4 | 0.05 |
|           | 4.84 | 4.34  | 4 | 0.05 |
|           | 4.40 | 5.60  | 4 | 0.03 |

---

---

|           |      |       |   |      |
|-----------|------|-------|---|------|
|           | 4.80 | 5.60  | 4 | 0.03 |
|           | 4.41 | 6.23  | 4 | 0.02 |
|           | 4.80 | 6.70  | 4 | 0.02 |
|           | 5.50 | 7.40  | 4 | 0.01 |
|           | 4.63 | 8.26  | 4 | 0.01 |
|           | 5.90 | 9.00  | 4 | 0.01 |
|           | 6.00 | 9.30  | 2 | 0.00 |
|           | 5.10 | 9.60  | 4 | 0.01 |
|           | 5.30 | 10.30 | 4 | 0.00 |
| <b>11</b> | 5.71 | 0.00  | 4 | 0.16 |
|           | 5.07 | 1.07  | 4 | 0.11 |
|           | 6.00 | 1.46  | 4 | 0.09 |
|           | 4.55 | 1.53  | 4 | 0.09 |
|           | 7.27 | 1.78  | 4 | 0.08 |
|           | 5.40 | 2.68  | 4 | 0.06 |
|           | 8.00 | 2.71  | 2 | 0.03 |
|           | 6.24 | 2.85  | 4 | 0.05 |
|           | 4.90 | 3.48  | 2 | 0.02 |
|           | 5.90 | 3.78  | 4 | 0.04 |
|           | 5.50 | 3.84  | 4 | 0.04 |
|           | 6.00 | 4.48  | 2 | 0.01 |
|           | 4.34 | 4.80  | 4 | 0.02 |
|           | 7.44 | 5.19  | 4 | 0.02 |
|           | 4.54 | 5.26  | 4 | 0.02 |
|           | 7.33 | 5.48  | 4 | 0.02 |
|           | 7.50 | 5.50  | 4 | 0.02 |
|           | 4.55 | 5.55  | 4 | 0.02 |
|           | 5.38 | 5.56  | 4 | 0.02 |
|           | 6.31 | 5.77  | 4 | 0.02 |
|           | 5.74 | 5.92  | 4 | 0.02 |
|           | 6.46 | 6.35  | 2 | 0.01 |
|           | 4.63 | 6.37  | 4 | 0.01 |
|           | 8.04 | 6.45  | 4 | 0.01 |
|           | 6.05 | 7.96  | 4 | 0.01 |
|           | 7.51 | 8.02  | 4 | 0.01 |
|           | 5.60 | 9.19  | 4 | 0.00 |
|           | 8.13 | 9.23  | 2 | 0.00 |
|           | 6.39 | 9.31  | 4 | 0.00 |
|           | 7.50 | 9.45  | 4 | 0.00 |
|           | 6.45 | 9.71  | 4 | 0.00 |
| <b>13</b> | 6.80 | 0.00  | 4 | 0.16 |
|           | 8.40 | 0.60  | 2 | 0.06 |
|           | 8.20 | 0.65  | 4 | 0.13 |
|           | 6.90 | 0.82  | 4 | 0.12 |
|           | 8.20 | 1.74  | 4 | 0.08 |
|           | 7.10 | 2.00  | 4 | 0.07 |
|           | 5.70 | 2.20  | 2 | 0.03 |

---

---

|           |      |      |   |      |
|-----------|------|------|---|------|
|           | 7.00 | 2.40 | 4 | 0.06 |
|           | 7.20 | 3.50 | 4 | 0.04 |
|           | 5.90 | 4.40 | 4 | 0.03 |
|           | 8.20 | 4.40 | 4 | 0.03 |
|           | 5.90 | 4.50 | 4 | 0.03 |
|           | 6.10 | 4.70 | 4 | 0.02 |
|           | 4.90 | 5.20 | 4 | 0.02 |
|           | 6.90 | 5.40 | 4 | 0.02 |
|           | 8.30 | 5.70 | 4 | 0.02 |
|           | 8.60 | 5.90 | 4 | 0.02 |
|           | 8.20 | 6.90 | 4 | 0.01 |
|           | 6.00 | 7.60 | 4 | 0.01 |
|           | 4.60 | 7.90 | 4 | 0.01 |
|           | 4.60 | 8.10 | 4 | 0.01 |
|           | 6.00 | 8.20 | 4 | 0.01 |
|           | 7.50 | 8.80 | 2 | 0.00 |
|           | 5.80 | 9.10 | 4 | 0.00 |
|           | 5.00 | 9.20 | 4 | 0.00 |
|           | 4.90 | 9.60 | 4 | 0.00 |
|           | 8.30 | 9.90 | 4 | 0.00 |
| <b>14</b> | 5.40 | 0.00 | 4 | 0.17 |
|           | 4.80 | 0.30 | 4 | 0.16 |
|           | 6.50 | 2.00 | 4 | 0.08 |
|           | 5.20 | 2.40 | 4 | 0.07 |
|           | 7.50 | 2.60 | 4 | 0.06 |
|           | 9.10 | 2.60 | 2 | 0.03 |
|           | 7.50 | 2.60 | 4 | 0.06 |
|           | 5.00 | 2.60 | 4 | 0.06 |
|           | 8.60 | 3.10 | 2 | 0.03 |
|           | 8.70 | 3.10 | 4 | 0.05 |
|           | 7.90 | 3.30 | 4 | 0.05 |
|           | 6.70 | 3.80 | 2 | 0.02 |
|           | 8.20 | 3.90 | 2 | 0.02 |
|           | 6.60 | 5.70 | 2 | 0.01 |
|           | 7.90 | 6.00 | 4 | 0.02 |
|           | 5.10 | 6.10 | 4 | 0.02 |
|           | 8.70 | 6.40 | 4 | 0.01 |
|           | 7.50 | 6.50 | 4 | 0.01 |
|           | 6.60 | 6.90 | 4 | 0.01 |
|           | 6.50 | 7.40 | 4 | 0.01 |
|           | 7.50 | 7.50 | 4 | 0.01 |
|           | 7.40 | 7.90 | 4 | 0.01 |
|           | 7.70 | 8.00 | 4 | 0.01 |
|           | 6.40 | 8.00 | 4 | 0.01 |
|           | 5.40 | 8.50 | 4 | 0.01 |
|           | 8.50 | 8.60 | 4 | 0.01 |
|           | 7.60 | 8.70 | 4 | 0.01 |
|           | 8.00 | 8.90 | 4 | 0.00 |

---

---

|           |      |       |   |      |
|-----------|------|-------|---|------|
|           | 6.60 | 9.80  | 4 | 0.00 |
|           | 5.30 | 9.90  | 4 | 0.00 |
|           | 5.30 | 10.50 | 4 | 0.00 |
| <b>15</b> | 8.00 | 0.00  | 4 | 0.19 |
|           | 6.90 | 0.23  | 4 | 0.17 |
|           | 7.00 | 0.58  | 4 | 0.15 |
|           | 8.00 | 1.14  | 4 | 0.12 |
|           | 7.40 | 2.44  | 4 | 0.07 |
|           | 7.80 | 3.20  | 4 | 0.05 |
|           | 5.50 | 4.40  | 4 | 0.03 |
|           | 6.70 | 5.30  | 4 | 0.02 |
|           | 5.80 | 6.10  | 4 | 0.02 |
|           | 7.90 | 6.10  | 4 | 0.02 |
|           | 5.10 | 6.50  | 4 | 0.01 |
|           | 6.90 | 7.50  | 4 | 0.01 |
|           | 8.00 | 7.60  | 4 | 0.01 |
|           | 6.80 | 7.70  | 4 | 0.01 |
|           | 8.00 | 7.80  | 4 | 0.01 |
|           | 7.40 | 7.90  | 4 | 0.01 |
|           | 5.60 | 8.00  | 4 | 0.01 |
|           | 6.20 | 8.00  | 4 | 0.01 |
|           | 6.80 | 8.30  | 4 | 0.01 |
|           | 7.00 | 8.40  | 4 | 0.01 |
|           | 7.60 | 8.40  | 4 | 0.01 |
|           | 7.00 | 8.40  | 4 | 0.01 |
|           | 7.80 | 8.70  | 4 | 0.01 |
|           | 8.00 | 8.80  | 4 | 0.01 |
|           | 8.00 | 8.80  | 4 | 0.01 |
|           | 7.00 | 8.90  | 4 | 0.01 |
|           | 5.30 | 9.00  | 4 | 0.01 |
|           | 6.90 | 9.00  | 4 | 0.01 |
|           | 6.00 | 9.10  | 4 | 0.00 |
|           | 7.30 | 9.20  | 4 | 0.00 |
|           | 7.10 | 9.40  | 4 | 0.00 |
|           | 7.80 | 9.60  | 4 | 0.00 |
|           | 7.70 | 9.60  | 4 | 0.00 |
|           | 7.30 | 9.60  | 4 | 0.00 |
|           | 7.40 | 9.70  | 4 | 0.00 |
|           | 7.40 | 9.70  | 4 | 0.00 |
|           | 7.70 | 9.70  | 4 | 0.00 |
|           | 7.80 | 10.00 | 4 | 0.00 |
|           | 7.80 | 10.00 | 4 | 0.00 |

---

**Table S2.** DFT Energies of lowest conformations of ligand dimethyl esters and corresponding monochelate complexes (pBP/DN\*).

|           | $E_{\text{ligand}}/\text{au}$ | $E_{\text{chelate}}/\text{au}$ | $\Delta E^{\text{a}}/\text{kJmol}^{-1}$ | $\Delta\Delta E^{\text{b}}/\text{kJmol}^{-1}$ |
|-----------|-------------------------------|--------------------------------|-----------------------------------------|-----------------------------------------------|
| <b>5</b>  | -917.3803                     | -10672.2849                    | 26                                      | 0                                             |
| <b>6</b>  | -1231.9318                    | -10986.8432                    | 8                                       | -18                                           |
| <b>7</b>  | -6065.1741                    | -15820.0828                    | 15                                      | -11                                           |
| <b>8</b>  | -1074.6669                    | -10829.5790                    | 6                                       | -20                                           |
| <b>9</b>  | -1389.2182                    | -11144.1292                    | 9                                       | -17                                           |
| <b>10</b> | -6222.4639                    | -15977.3769                    | 4                                       | -22                                           |
| <b>13</b> | -1613.1351                    | -11368.0154                    | 90                                      | 64                                            |
| <b>14</b> | -845.5425                     | -10600.4410                    | 0                                       | -26                                           |
| <b>15</b> | -842.1371                     | -10597.0344                    | 45                                      | 19                                            |

$$\begin{aligned} \text{}^{\text{a}}\Delta E &= 2625 \{ (E_{\text{chelate}} + 2E_{\text{MeOAc}}) - (E_{\text{ligand}} + E_{\text{Rh}_2(\text{OAc})_4}) \} \\ &= 2625 \{ E_{\text{chelate}} - E_{\text{ligand}} + 9754.9144 \}. \\ \text{Rh}_2(\text{OAc})_4 &= -10291.9001 \text{ au}, \text{MeOAc} = -268.4929 \text{ au} \\ \text{}^{\text{b}}\Delta\Delta E &= \Delta E - 26. \end{aligned}$$
